# Supplementary material for: Size effects in magnetic separation for rapid and efficient bacteria removal
Source: Royal Society of Chemistry journal article supplement (doi:10.1039/d5nr03699b), 2025-12-16
Supplement: d5nr03699b1.pdf [file d5nr03699b1.pdf]

## *Supporting Information*

# Size Effects in Magnetic Separation for Rapid and Efficient Bacteria Removal

Jingge Chen<sup>1,2</sup>, Alicia M. Chandler<sup>2</sup>, Indrek Külaots<sup>2</sup>, Qingbo Zhang<sup>3</sup>, and Vicki L. Colvin<sup>\*1,2,3</sup>

<sup>1</sup>Institute for Biology, Engineering, and Medicine, Brown University, RI 02912, USA

<sup>2</sup>School of Engineering, Brown University, RI 02912, USA

<sup>3</sup>Department of Chemistry, Brown University, Providence, RI 02912, USA

Corresponding Author

Vicki L. Colvin

Email: [vicki\\_colvin@brown.edu](mailto:vicki_colvin@brown.edu)

## 1. Supplementary results and discussion

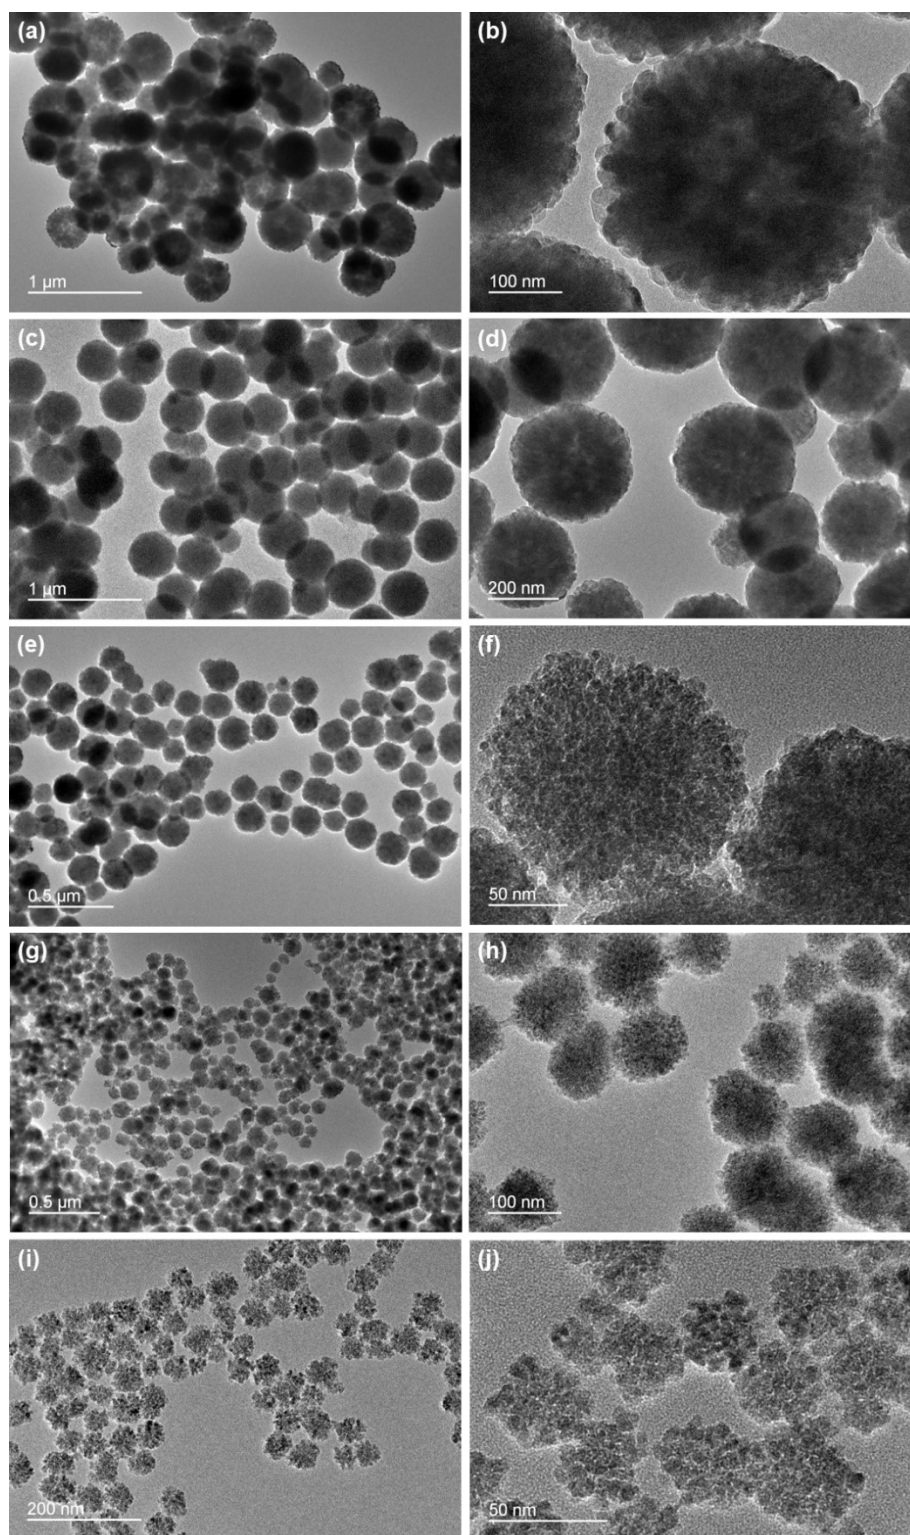

**Figure S1.** TEM images of porous magnets: PM\_420 nm (a, b), PM\_360 nm (c, d), PM\_210 nm (e, f), PM\_90 nm (g, h), and PM\_50 nm (i, j).

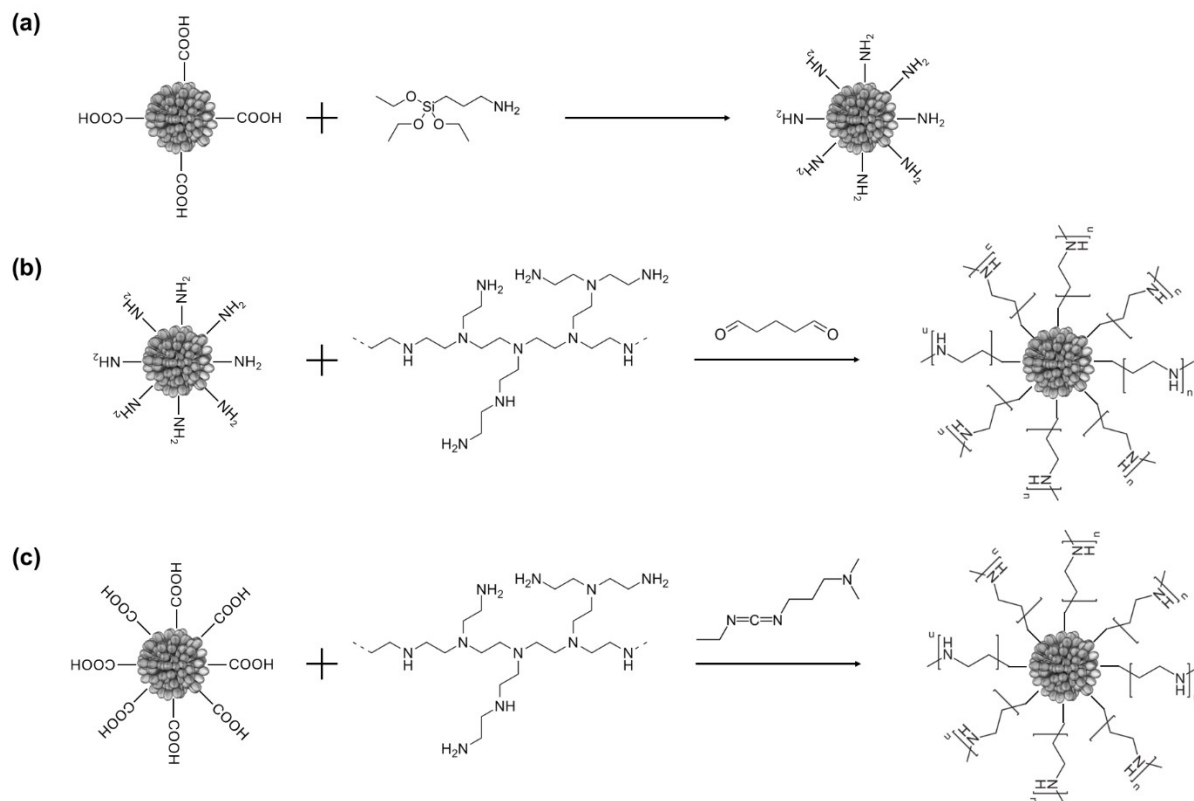

**Figure S2.** The PEI functionalization of porous magnets. PM\_420 nm, PM\_360 nm, PM\_210 nm and PM\_90 nm was first modified with APTES (a) and then functionalized with PEI with glutaraldehyde as cross-linking agent (b). PM\_50 nm was functionalized with PEI through EDC/NHS chemistry (c).

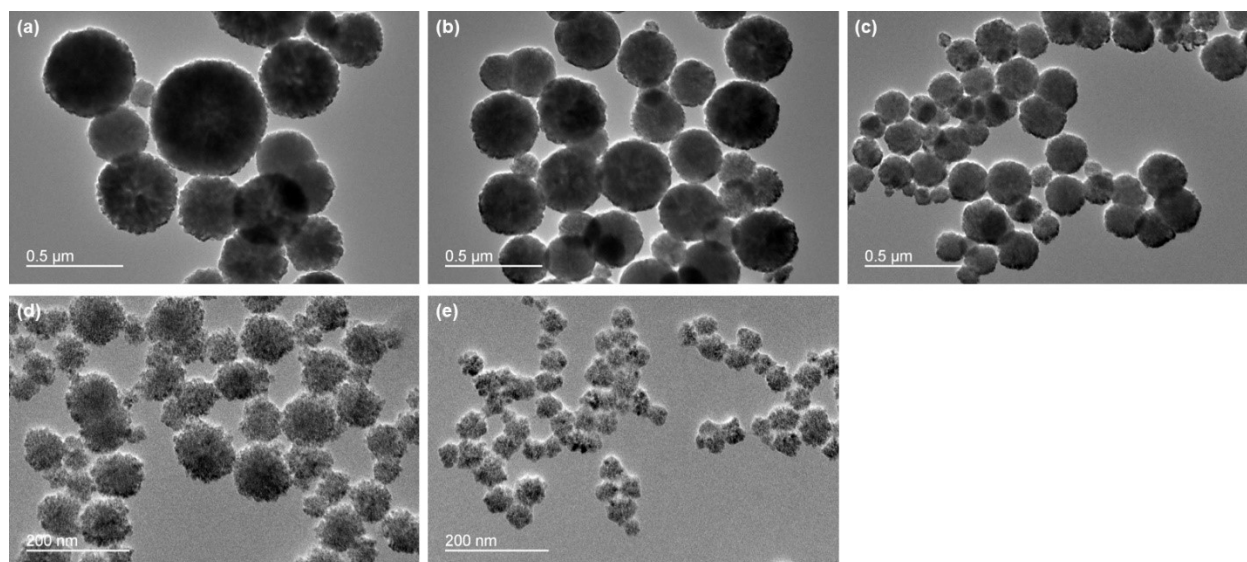

**Figure S3.** TEM images of PEI modified porous magnets: PPM\_420 nm (a), PPM\_360 nm (b), PPM\_210 nm (c), PPM\_90 nm (d), and PPM\_50 nm (e).

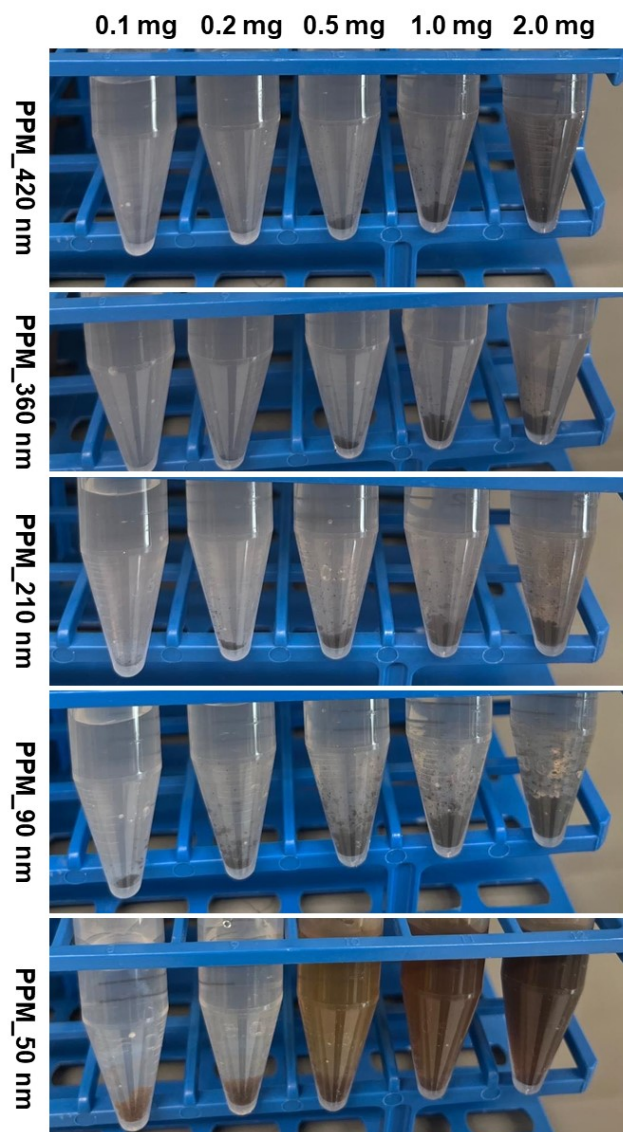

**Figure S4.** The images of *E. Coli* bacteria (10<sup>9</sup> CFU) reacted with different amounts of particles (0.1 – 2.0 mg).

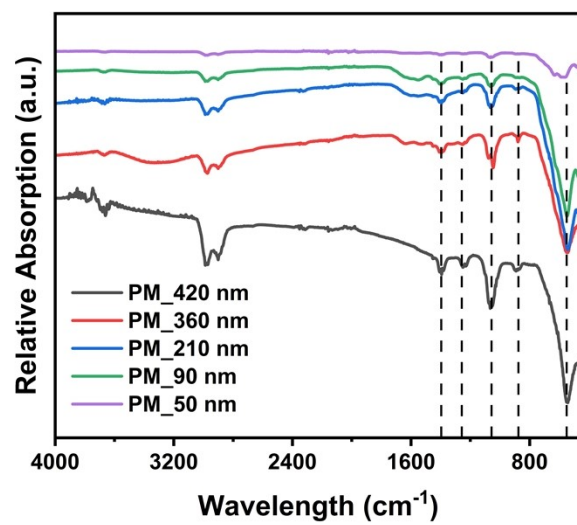

**Figure S5.** The FTIR spectrums of porous magnets with different sizes (before PEI coating).

## References

- (1) Liu, Y.; Li, Y.; Li, X.-M.; He, T. Kinetics of (3-Aminopropyl)Triethoxysilane (APTES) Silanization of Superparamagnetic Iron Oxide Nanoparticles. *Langmuir* **2013**, 29 (49), 15275–15282. <https://doi.org/10.1021/la403269u>.
- (2) Lastoskie, C.; Gubbins, K.; Quirke, N. Pore Size Distribution Analysis of Microporous Carbons: A Density Functional Theory Approach. *The Journal of Physical Chemistry* **1993**, 97. <https://doi.org/10.1021/j100120a035>.
